# Supplementary material
Source: Springer Nature journal article supplement (https://www.springermedizin.de/resource/supplementary/12879_2013_2648_MOESM1_ESM.pdf/9444986)
Supplement: MOESM1 [file 9444986]

**Additional file 1.** Source and geographic origin of *Coccidioides posadasii* isolates.

| <b>Isolates</b> | <b>Source</b>          | <b>Origin</b>        |
|-----------------|------------------------|----------------------|
| M0104           | Catheter (Peritoneal)  | Distrito Federal, MX |
| M1204           | Sputum                 | Durango, MX          |
| M1404           | Cerebrospinal fluid    | Torreón, MX          |
| M1505           | Cerebrospinal fluid    | Torreón, MX          |
| M2305           | Pleural secretion      | Torreón, MX          |
| M2805           | Bronchoalveolar lavage | Torreón, MX          |
| M3005           | Sputum                 | Torreón, MX          |
| M3905           | ND                     | Baja California, MX  |
| M5406           | ND                     | Tijuana, MX          |
| M5708           | ND                     | San Luis Potosí, MX  |
| HU1             | ND                     | Monterrey, MX        |
| HU2             | ND                     | Monterrey, MX        |
| HU11            | Bronchoalveolar lavage | Monterrey, MX        |
| HU12            | Bronchoalveolar lavage | Monterrey, MX        |
| HU18            | Articular secretion    | Monterrey, MX        |
| HU19            | Bronchial secretion    | Monterrey, MX        |
| HU24            | Sputum                 | Monterrey, MX        |
| 37.3            | ND                     | MX                   |
| 5256            | ND                     | MX                   |
| MA              | Bronchoalveolar lavage | Campeche, MX         |
| SiFe            | ND                     | MX                   |
| 972579          | Node biopsy            | Catamarca, AR        |

|        |                        |                         |
|--------|------------------------|-------------------------|
| 073089 | Bronchoalveolar lavage | Catamarca, AR           |
| 073094 | Cerebrospinal fluid    | Mendoza, AR             |
| 073129 | Skin biopsy            | Salta, AR               |
| 073130 | Blood culture          | Catamarca, AR           |
| 073131 | Lung biopsy            | La Rioja, AR            |
| 083376 | Bronchoalveolar lavage | Catamarca, AR           |
| 083377 | Skin biopsy            | Catamarca, AR           |
| 083380 | Leg abscess            | Catamarca, AR           |
| 083382 | Node biopsy            | Santiago del Estero, AR |
| 083381 | Sputum                 | Catamarca, AR           |

---

ND-undetermined; MX-Mexico; AR-Argentina
